# Supplementary material
Source: publisher figshare collection journal article supplement (https://rs.figshare.com/ndownloader/files/12818510)
Supplement: Supplementary file 1 [file 12818510]

## Sheet: sheet1
clade	age	formation	B_assemblage	Ba_min_temp	Ba_max_temp	Ba_no_temp	Ba_no_constant	q0_obs	q0_est	q1_obs	q1_est	q2_obs	q2_est
bivalvia	pliocene_early	goose_creek_limestone	0.0137081	0.0164019	0.0354922	1992547051	1.04309e-13	52	73.276	28.347	31.497	18.83	19.789
bivalvia	pliocene_early	playa_grande_formation	0.0027396	0.00443946	0.00911228	573075223	2.006e-14	6	6	5.742	6.973	5.444	8.273
bivalvia	pliocene_early	tamiami_formation_lower	0.0118781	0.0156604	0.0335254	1871842818	8.90394e-14	47	167.366	23.999	32.774	13.617	14.586
bivalvia	pliocene_late	bowden_formation	0.00368985	0.00686679	0.012668	795165629	2.81472e-14	8	15.556	6.522	9.902	5.586	7.65
bivalvia	pliocene_late	chowan_river_formation	0.00803779	0.0101891	0.0234895	1470123606	6.07184e-14	24	30.2	18.818	21.308	16.233	18.486
bivalvia	pliocene_late	jackson_bluff_formation	0.005617	0.00727417	0.0163339	926953204	4.19343e-14	80	94.056	36.835	37.669	25.544	25.829
bivalvia	pliocene_late	mare_formation	0.00201446	0.00275871	0.00614454	393711619	1.45177e-14	6	6.486	4.483	4.888	3.701	4.02
bivalvia	pliocene_late	nashua_formation	0.00918124	0.0121238	0.0263448	1628631703	6.77253e-14	65	89.455	40.269	43.79	29.371	30.984
bivalvia	pliocene_late	raysor_formation	0.00598058	0.00734363	0.0166172	988972118	4.51427e-14	78	79.799	40.249	41.048	28.657	29.039
bivalvia	pliocene_late	tamiami_formation_buckingham_limestone	0.0159049	0.02007	0.042621	2407674892	1.20913e-13	12	13.095	10.235	13.701	8.471	12.545
bivalvia	pliocene_late	tamiami_formation_ochopee_limestone	0.0225973	0.0282829	0.0595166	3271293272	1.73067e-13	24	60.993	12.531	18.419	7.44	8.16
bivalvia	pliocene_late	tamiami_formation_pinecrest_beds	0.00867381	0.0108414	0.023036	1351117641	6.44814e-14	127	140.998	69.274	70.137	52.529	52.991
bivalvia	pliocene_late	yorktown_formation	0.0125697	0.0136537	0.0330763	2255392212	9.59926e-14	53	73.156	20.04	20.442	13.914	14.011
bivalvia	pleistocene_early	caloosahatchee_formation	0.00701277	0.00896067	0.0190744	1154261207	5.17507e-14	112	120.448	50.998	51.668	27.03	27.18
bivalvia	pleistocene_early	columbia_formation	0.00625737	0.00766163	0.0170551	1138425708	4.49095e-14	25	31.069	17.804	20.755	13.928	15.823
bivalvia	pleistocene_early	james_city_formation	0.0117291	0.0161691	0.035507	1995504835	8.64618e-14	13	17.062	9.389	11.813	7.207	8.571
bivalvia	pleistocene_early	waccamaw_formation	0.00862073	0.0108071	0.023363	1382927902	6.50386e-14	63	75.491	32.133	33.041	21.932	22.264
bivalvia	pleistocene_middle	bermont_formation	0.00517463	0.00693708	0.0152291	967612804	3.74105e-14	101	120.595	56.461	57.444	45.965	46.546
bivalvia	pleistocene_middle	canepatch_formation	0.00772202	0.0101549	0.0222239	1373055637	5.64586e-14	34	42.344	27.873	37.541	23.358	32.577
bivalvia	pleistocene_late	acredale_formation	0.00939776	0.0143867	0.0318095	1882179402	6.737e-14	15	27.087	6.832	8.196	4.377	4.587
bivalvia	pleistocene_late	anastasia_formation	0.00909793	0.0126774	0.0280286	1814063817	6.54195e-14	40	42.216	26.643	29.971	18.599	20.487
bivalvia	pleistocene_late	falmouth_formation	0.00247129	0.00700685	0.0112835	747321172	1.7886e-14	6	7.867	5.154	6.689	4.592	6.176
bivalvia	pleistocene_late	flanner_beach_formation	0.00683802	0.0096735	0.0214351	1473251612	4.93824e-14	8	8.471	7.293	9.368	6.721	10.462
bivalvia	pleistocene_late	fort_thompson_formation	0.0112916	0.0163503	0.0359573	2123520576	8.07358e-14	56	61.78	19.026	19.613	7.797	7.846
bivalvia	pleistocene_late	grotto_beach_formation_cockburn_town_member	0.00179211	0.00385381	0.0069878	472340574	1.33038e-14	14	26.857	12.586	24.751	11.308	23.333
bivalvia	pleistocene_late	ironshore_formation	0.00226984	0.0056724	0.00963167	644740976	1.64461e-14	16	26.323	13.667	21.497	11.864	18.6
bivalvia	pleistocene_late	jaimanitas_formation	0.00161308	0.00467693	0.00752372	512816864	1.18635e-14	31	33.245	20.755	21.48	16.658	17.203
bivalvia	pleistocene_late	neuse_formation	0.00259479	0.00340248	0.00750263	594530087	1.88129e-14	12	24.6	11.368	27.193	10.714	35
bivalvia	pleistocene_late	satilla_formation	0.00802194	0.0115794	0.0256999	1741311771	5.79656e-14	18	22.129	12.104	13.453	9.725	10.562
gastropoda	pliocene_early	goose_creek_limestone	0.000134694	0.000179384	0.000396515	2.27418e+07	2.01271e-12	21	28.955	14.596	15.824	11.447	12.174
gastropoda	pliocene_early	tamiami_formation_lower	0.000157461	0.00019124	0.000415589	2.35535e+07	2.43393e-12	16	50.8	10.173	21.363	6	7.25
gastropoda	pliocene_late	bowden_formation	4.52533e-05	6.71933e-05	0.000164276	9.64407e+06	6.70867e-13	5	5.467	4.436	5.249	4.091	5.25
gastropoda	pliocene_late	chowan_river_formation	5.96356e-05	7.67932e-05	0.000168682	1.00462e+07	9.61175e-13	14	21.911	10.658	15.409	8.258	10.783
gastropoda	pliocene_late	jackson_bluff_formation	0.000109347	0.000143992	0.000339149	1.94111e+07	1.60296e-12	63	73.116	32.889	34.046	20.337	20.701
gastropoda	pliocene_late	mare_formation	3.66978e-05	6.73409e-05	0.000148174	9.2008e+06	5.68935e-13	9	11.152	7.603	9.795	6.696	9.036
gastropoda	pliocene_late	nashua_formation	0.000133206	0.000172143	0.000397675	2.47453e+07	1.92885e-12	38	47.97	20.633	22.274	15.166	15.836
gastropoda	pliocene_late	raysor_formation	9.02497e-05	0.000117647	0.000265403	1.562e+07	1.33809e-12	51	75.477	28.673	29.624	22.178	22.628
gastropoda	pliocene_late	tamiami_formation_ochopee_limestone	0.000190756	0.000235557	0.000523456	2.9512e+07	2.6606e-12	12	32.512	5.862	8.15	3.418	3.627
gastropoda	pliocene_late	tamiami_formation_pinecrest_beds	0.000170958	0.000211379	0.000454373	2.56952e+07	2.50187e-12	119	122.2	58.223	58.772	41.126	41.374
gastropoda	pliocene_late	yorktown_formation	6.19054e-05	7.5496e-05	0.000164726	9.51541e+06	1.01838e-12	30	32.496	12.206	12.545	7.857	7.945
gastropoda	pleistocene_early	caloosahatchee_formation	0.000154819	0.000193687	0.000421635	2.45105e+07	2.23815e-12	93	101.447	39.821	40.52	30.098	30.384
gastropoda	pleistocene_early	columbia_formation	0.000146657	0.000192835	0.000439152	2.70895e+07	2.03471e-12	13	17.418	10.103	11.844	8.473	9.834
gastropoda	pleistocene_early	james_city_formation	3.26459e-05	4.74532e-05	0.000105659	6.73512e+06	4.89674e-13	11	17.227	1.579	1.633	1.187	1.188
gastropoda	pleistocene_early	waccamaw_formation	9.60564e-05	0.000122367	0.000277119	1.70518e+07	1.45494e-12	43	47.495	24.405	25.141	18.633	19.035
gastropoda	pleistocene_middle	bermont_formation	0.000123688	0.000165843	0.000379527	2.34834e+07	1.77872e-12	75	81.398	41.088	41.738	32.218	32.595
gastropoda	pleistocene_middle	canepatch_formation	5.73172e-05	7.42854e-05	0.000180705	1.30406e+07	8.6677e-13	16	28.321	11.871	14.355	9.761	11.181
gastropoda	pleistocene_late	acredale_formation	3.56933e-05	4.89015e-05	0.000111266	7.53832e+06	6.29348e-13	9	11.955	5.215	5.72	3.924	4.109
gastropoda	pleistocene_late	anastasia_formation	0.000119688	0.000155711	0.000369074	2.46566e+07	1.72867e-12	22	26.468	12.678	14.032	9.193	9.769
gastropoda	pleistocene_late	flanner_beach_formation	4.648e-05	5.72818e-05	0.000147482	1.21077e+07	7.50182e-13	5	5.152	4.553	5.635	4.172	6.111
gastropoda	pleistocene_late	fort_thompson_formation	0.000152281	0.000199683	0.000465602	2.92247e+07	2.13643e-12	27	37.635	13.145	13.932	9.178	9.406
gastropoda	pleistocene_late	jaimanitas_formation	3.25661e-05	6.95561e-05	0.000127277	8.62596e+06	4.45064e-13	11	11.661	6.723	7.093	5.544	5.788
gastropoda	pleistocene_late	satilla_formation	6.37995e-05	8.17821e-05	0.000201054	1.48708e+07	1.01381e-12	10	10.986	7.062	7.613	5.749	6.155
